# Supplementary material for: Hierarchical ZSM-5 Zeolite Synthesized Only with Simple Organic Templates
Source: MDPI journal article supplement (doi:10.3390/inorganics11070297), 2023-07-14
Supplement: s1 [file s1]

# Supplementary Materials

## **Hierarchical ZSM-5 Zeolite Synthesized Only with Simple Organic Templates**

Ying Zhao, Yuanchen Li, Peng Cheng\* and Hongdan Zhang\*

Institute of Catalysis for Energy and Environment, College of Chemistry and Chemical Engineering, Shenyang Normal University, Shenyang, 110034, China.

\*Correspondence: [chengp1987@126.com](mailto:chengp1987@126.com) (P.C.); [zhanghd11@163.com](mailto:zhanghd11@163.com) (H.Z.)

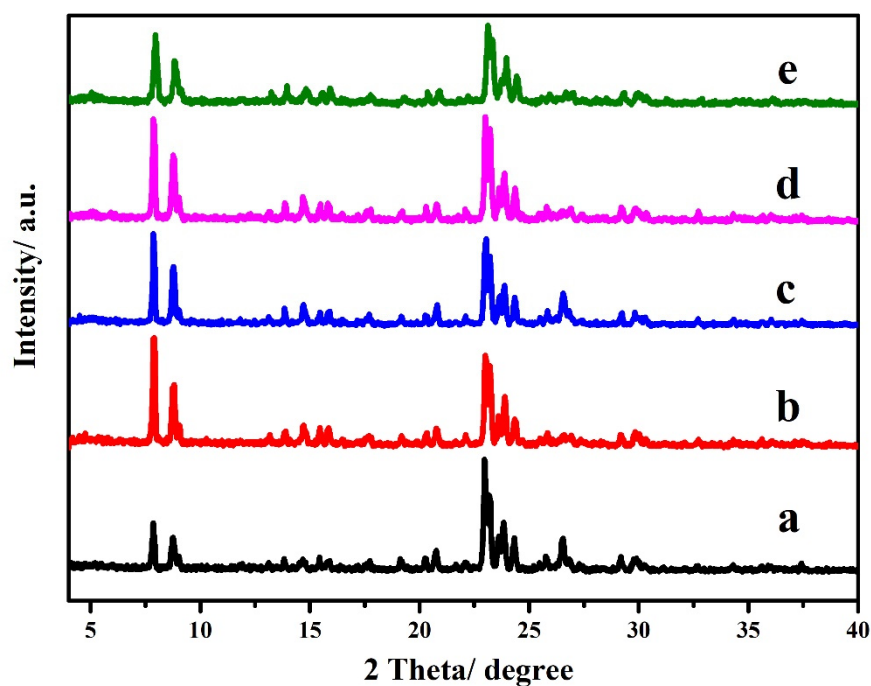

**Figure S1.** XRD patterns of different samples synthesized under conventional static hydrothermal conditions (a) with a TETA/SiO<sub>2</sub> ratio of 0.2 crystallized for 48 h; (b) with a TETA/SiO<sub>2</sub> ratio of 0.3 crystallized for 48 h; (c) with a TETA/SiO<sub>2</sub> ratio of 0.3 crystallized for 72 h; (d) with a TETA/SiO<sub>2</sub> ratio of 0.4 crystallized for 48 h; (e) with a TETA/SiO<sub>2</sub> ratio of 0.4 crystallized for 72 h.

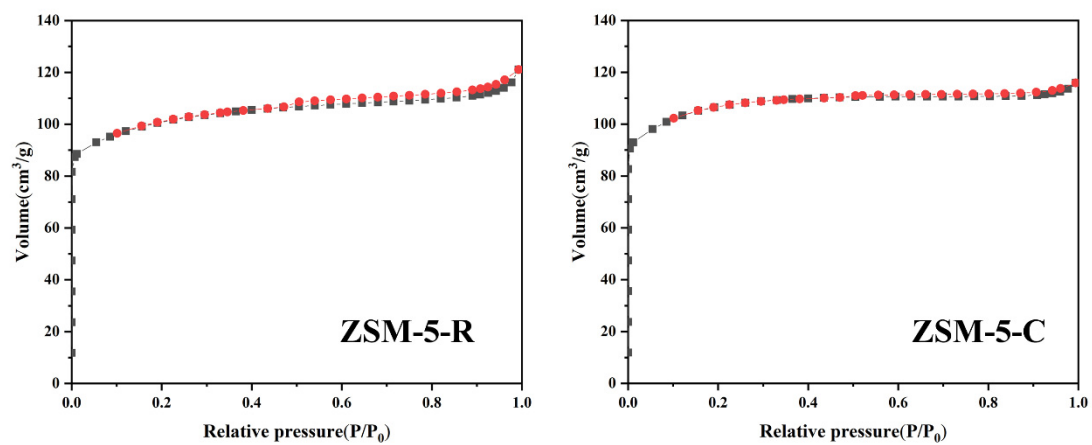

**Figure S2.** N<sub>2</sub> adsorption isotherms of ZSM-5-R and ZSM-5-C.
